# Supplementary material
Source: PubMed Central journal article supplement (PMC5621883)
Supplement: jciinsight-2-93343-s001.pdf [file jciinsight-2-93343-s001.pdf]

1 **Supplemental Material**

2

3 **Tead1 is required for maintaining adult cardiomyocyte function and its loss results in**  
4 **lethal dilated cardiomyopathy**

5

6 Ruya Liu<sup>1</sup>, Jeongkyung Lee<sup>1</sup>, Byung S. Kim<sup>1</sup>, Qionglng Wang<sup>2,3</sup>, Samuel K. Buxton<sup>2,3</sup>, Nikhil  
7 Balasubramanyam<sup>1</sup>, Jean J. Kim<sup>4,5</sup>, Jianrong Dong<sup>5</sup>, Aijun Zhang<sup>6</sup>, Shumin Li<sup>6</sup>, Anisha A.  
8 Gupte<sup>6</sup>, Dale J. Hamilton<sup>6</sup>, James F. Martin<sup>2,3,7</sup>, George G. Rodney<sup>3</sup>, Cristian Coarfa<sup>5</sup>, Xander  
9 HT. Wehrens<sup>2,3</sup>, Vijay K. Yechoor<sup>1,2</sup> & Mousumi Moulik<sup>8</sup>

## 1 **Supplemental Methods**

### 2 **Generation of *Tead1* flox mice**

3 Briefly, the *Tead1* targeting vector was constructed using PRPGS00097\_A\_H05 harboring two  
4 loxP sites encompassing a neomycin resistance cassette flanked by two FRT sites. Targeting  
5 arm sequences were isolated from C57BL/6N genomic DNA by PCR. The *Tead1* 5' targeting  
6 arm (5169 bp), *Tead1* 3' targeting arm (4773 bp), and *Tead1* knockout arm (2 kb) were cloned  
7 into the vector. The sequence-verified targeting vector was linearized and electroporated into  
8 C57BL/6N-derived ES cells. Targeting of the mutant allele was screened through Southern blot  
9 analysis. Targeted ES cells were injected into blastocysts to generate chimeric mice. High-  
10 percentage chimeric males were bred with mice expressing FLPe recombinase to remove the  
11 neomycin resistance cassette to generate *Tead1* loxP alleles [floxexon:  
12 ENSMUSE00000203030]. The homologous recombination was verified by long range PCR  
13 using primer set #1 (forward: GCAGTGCTCTCAGGAGTGCTGAGTGCGAC; reverse:  
14 AGAAGCCACAGTGCCCTGGAAGTGT) and regular PCR using primer set #2 (forward:  
15 GCCTTCTGAGTGCTGGCATTAAAGG; reverse: same as #1reverse) (**Supplemental Figure**  
16 **2**). Mice were genotyped using *Tead1*-flox-forward (GCCTTCTGAGTGCTGGCATTAAAGG)  
17 and reverse (AAGGCAGACTCCTTCATTGGAATGG) primers.

18 **Antibodies for immunoblotting and immunofluorescence.** The antibodies used for  
19 immunoblotting are listed below: TEAD1 [EPR3967(2)] (ab133533, Abcam; 1:2,000), GAPDH  
20 [FL-335] (sc-25778, Santa Cruz Biotechnology; 1:4,000), SERCA2 (4388S, Cell Signaling;  
21 1:2,000), pPLN<sup>Ser16</sup> (07-052, Millipore; 1:1,000-5,000), pPLN<sup>Thr17</sup> (A010-13, Badrilla; 1:2,000),  
22 PLN (05-205, Millipore; 1:2,000-5,000), PP1c (1050-1, Epitomics; 1:5,000), I-1 (ab40877,  
23 Abcam; 1:5,000), HSP90 (4874S, Cell Signaling; 1:2,000). The antibodies for  
24 immunofluorescence are: cardiac Troponin T [1C11] (ab8295, Abcam; 1:500), TEAD1 ([clone  
25 31] 610923, BD Biosciences; 1: 200).

1 **Plasmids construction.** For the construction of FUCGW-*hTEAD1*, full length human *TEAD1*  
2 gene (NM\_021961.5) was amplified by PCR using primers with EcoRI restriction sites (F:  
3 CGgaattcATTGAGCCCAGCAGCTGGAG; R: CGgaattcTCAGTCCTTTACAAGCCTGT) from  
4 human embryonic kidney 293T cell cDNA template and then cloned into modified FUCGW  
5 lentiviral vector (a gift from Dr. Yi Li). For the construction of pGL3-basic-*I1-1.2k* luciferase  
6 reporter, the -2390~-1137bp 5' promoter region was amplified by PCR using primers with MluI  
7 and BglII restriction sites (F: CGacgcgtCAGCTCAGGGCATAAATAAAGGTC, R:  
8 GAagatctAGAGAAGGAGAAGGCCTATAGTGC) from a C57BJ/6 wild-type mouse genomic  
9 DNA template and cloned into pGL3-basic vector (Promega). For the construction of pGL3-  
10 basic-*Serca2a-0.8k* luciferase reporter, the -2303~-1574bp 5' promoter region was amplified as  
11 described above flanked with KpnI and BglII restriction sites.

12 **Histology.** For Masson's Trichrome staining, dissected hearts were immediately fixed in 10%  
13 formalin overnight at room temperature, followed by paraffin embedding. Coronal or cross  
14 sectioned tissues (5  $\mu$ m) were deparaffinized in Histo-Clear (National Diagnostics), rehydrated  
15 and fixed in Bouin's Solution at 56°C for 1 hr. Following washes in deionized water, sections  
16 were sequentially stained with Weigert's Iron Hematoxylin, Beibrich Scarlet-Acid Fuchsin  
17 solution, phosphotungstic/phosphomolybdic acid and Aniline blue (25088, Masson's Trichrome  
18 stain kit from Polysciences). Sections were dehydrated via ethanol series, cleared in Xylene and  
19 mounted in resin-based medium. Images were analyzed using a Zeiss Axioplan-2 imaging  
20 system.

21 For wheat germ agglutinin (WGA) staining of tissue sections, following antigen retrieval in  
22 boiling 10mmol/L sodium citrate (pH 6.0) for 30min, sections were blocked with 10% goat  
23 serum, followed by incubation of the sections with Rhodamine-WGA (RL-1022, Vector Lab) at  
24 5 $\mu$ g/ml and mounted with ProLong® Goad Antifade Mountant (ThermoFisher). Terminal  
25 deoxynucleotidyl transferase (TdT) dUTP Nick-End Labeling (TUNEL) assay was carried out

1 following the manufacturer's protocol using *In Situ* Cell Death Detection Kit (11684817910,  
2 Roche). For cytology staining, cells were washed with PBS and fixed in 10% formalin for 15 min  
3 at room temperature, incubated in 0.5% Triton X-100/PBS and blocked in 2% BSA/PBS. Cells  
4 were then incubated with primary antibodies as indicated, subsequently with Alexa Fluor  
5 conjugated anti-mouse IgG (Invitrogen, 1:200). Images were taken with a DeltaVision  
6 (Deconvolution) image restoration microscope or a Zeiss Axioplan-2 imaging system.

7 **RNA extraction and real-time PCR.** Total RNAs were extracted and cleaned up using RNeasy  
8 Mini Kit (QIAGEN) according to manufacturer's protocol. Complementary DNA were  
9 synthesized using q-Script cDNA Supermix kit (Quanta Biosci.). Realtime PCR was performed  
10 using Perfecta SYBR Green Supermix (Quanta Biosci.) in a Roche 480 Light Cycler machine.  
11 Relative mRNA expression levels were determined by normalization of target genes to 36B4 as  
12 internal control. Primer sequences are available upon request.

13 **Microarray analyses.** Microarray sample quality control and preparation including cRNA  
14 synthesis, labeling and RNA amplification, hybridization procedures were carried out by  
15 Genomic and RNA Profiling Core in the Baylor College of Medicine Advanced Technology Core  
16 Laboratories. Microarray profiling was performed using SurePrint G3 Mouse GE 8x60K  
17 Microarray Kit (Agilent Technologies). All analysis was corrected for multiple hypotheses testing,  
18 and effects were determined to be significant when there was a  $\geq 1.5$ -fold increase/decrease  
19 relative to the control and they had an adjusted *P* value  $< 0.05$  and FDR  $< 0.25$ .

20 **Western blot analysis.** Tissue or cell protein samples were prepared in ice-cold lysis buffer  
21 (100 mmol/L TrisHCl pH7.4, 10 mmol/L NaCl, 1 mmol/L EDTA, 1 mmol/L EGTA, 10% glycerol,  
22 0.5% deoxycholate, 1% Triton X-100, 0.1% SDS, 20mmol/L  $\text{Na}_4\text{P}_2\text{O}_7$ , 2 mmol/L  $\text{Na}_3\text{VO}_4$ , 1  
23 mmol/L NaF, 1 mmol/L PMSF) supplemented with 1X protease inhibitor and phosphatase  
24 inhibitor (Roche) when necessary. Equal amount of protein samples were loaded and  
25 fractionated by SDS-PAGE, then transferred to 0.45  $\mu\text{m}$  pore-size nitrocellulose membranes

1 (Millipore). Membranes were blocked in 5% non-fat milk-TBS (w/v), then incubated with  
2 indicated primary antibodies and HRP-conjugated secondary antibodies, enhanced  
3 chemiluminescence substrate (Thermo Sci.) was applied for detection. Band densities were  
4 quantified by ImageJ software.

5 **Chromatin immunoprecipitation (ChIP) and luciferase reporter assay.** Mouse genomic  
6 sequences were retrieved from Ensemble database (<http://www.ensembl.org>). Lasagna search  
7 ([http://biogrid-head.engr.uconn.edu/lasagna\\_search/](http://biogrid-head.engr.uconn.edu/lasagna_search/)) was used to predict Tead1 binding sites.  
8 For ChIP assay, briefly, 120-150mg mouse heart ventricles were dissected, fixed in 1.5%  
9 formaldehyde and collected using SDS-lysis buffer. The chromatin was fragmented to sizes  
10 ranging from 200-1000bp by sonication, immunoprecipitated by 2 $\mu$ g normal mouse IgG or  
11 Tead1 antibody (610923, BD Biosciences) and protein A/G beads. Precipitated chromatin  
12 fragments were then purified. PCR was carried out for detection of the DNA enrichment.

13 The rat cardiomyoblast H9c2 cell line (CRL-1446, ATCC) was maintained in Dulbecco's  
14 modified Eagle's medium with 10% fetal bovine serum at 37°C in 5% CO<sub>2</sub>. For luciferase  
15 reporter assay, H9c2 or neonatal cardiomyocytes were seeded in 24-well plates at 50-60%  
16 confluence, pGL3-*I1*-1.2k 200ng and pRL-null (Promega) 10ng were cotransfected using  
17 jetPRIME (Polyplus). After 48 hours transfection, cells were harvested and luciferase activity  
18 was measured using the Dual-Luciferase Reporter Assay System (Promega), relative luciferase  
19 unit was determined by normalization to renilla activity as internal control.

1 **Supplemental Tables**

2 **Supplemental Table 1.** *mSerca2a* promoter regions harbor multiple Tead binding motifs.

| gi 372099105:c122507225-122501226 Mus musculus strain C57BL/6J chromosome 5, GRCm38.p3 C57BL/6J |                     |                    |        |       |          |         |
|-------------------------------------------------------------------------------------------------|---------------------|--------------------|--------|-------|----------|---------|
| <i>Serca2a</i> NM_009722                                                                        |                     |                    |        |       |          |         |
| Name                                                                                            | Sequence            | Position (0-based) | Strand | Score | p-value  | E-value |
| TEAD1(MA0090.1)                                                                                 | CACATTCCTCTG        | 3831               | +      | 15.37 | 0        | 0       |
| TEAD1(MA0090.1)                                                                                 | ACATTCCTCTG         | 3832               | +      | 11.28 | 0        | 0       |
| TEAD1(MA0090.1)                                                                                 | AGCATTCCACTT        | 340                | -      | 9.95  | 0.000175 | 1.05    |
| TEAD1(MA0090.1)                                                                                 | AACATTCCAGA         | 2278               | +      | 8.38  | 0.0004   | 2.40    |
| TEAD1(MA0090.1)                                                                                 | AGCATTGCACAG        | 1765               | +      | 7.71  | 0.000675 | 4.0     |
| TEAD1(MA0090.1)                                                                                 | TGAATTCCAGGC        | 1842               | -      | 7.63  | 0.000725 | 4.3     |
| TEAD1(MA0090.1)                                                                                 | AGCATTCCACT         | 341                | -      | 6.94  | 0.000975 | 5.8     |
| TEAD1(MA0090.1)                                                                                 | <b>TGGATTCCAGTT</b> | <b>3325</b>        | -      | 6.94  | 0.000975 | 5.8     |

3

4 **Supplemental Table 2.** *mPpp1r1a (l-1)* promoter regions harbor multiple Tead binding motifs.

| gi 372099095:c103542992-103537993 Mus musculus strain C57BL/6J chromosome 15, GRCm38.p3 C57BL/6J |              |                    |        |       |         |         |
|--------------------------------------------------------------------------------------------------|--------------|--------------------|--------|-------|---------|---------|
| <i>Ppp1r1a</i> NM_021391                                                                         |              |                    |        |       |         |         |
| Name                                                                                             | Sequence     | Position (0-based) | Strand | Score | p-value | E-value |
| TEAD1(MA0090.1)                                                                                  | GACATTCCTGAC | 519                | -      | 11.64 | 0       | 0       |

|                 |              |      |   |       |          |       |
|-----------------|--------------|------|---|-------|----------|-------|
| TEAD1(MA0090.1) | CACATCCCAGTG | 3502 | - | 10.56 | 2.50E-05 | 0.125 |
| TEAD1(MA0090.1) | TGCACTCCTGGG | 2009 | - | 10.55 | 7.50E-05 | 0.37  |
| TEAD1(MA0090.1) | CACATTGCACTG | 3495 | + | 10.29 | 0.00015  | 0.75  |
| TEAD1(MA0090.1) | TGAATTCCACTG | 1065 | + | 9.21  | 0.00025  | 1.25  |
| TEAD1(MA0090.1) | AACATTCCTACT | 1681 | + | 9.14  | 0.000275 | 1.37  |
| TEAD1(MA0090.1) | GACATTCCTGA  | 520  | - | 8.97  | 0.0003   | 1.5   |
| TEAD1(MA0090.1) | CACACTCCAAAG | 4450 | + | 8.01  | 0.000525 | 2.62  |
| TEAD1(MA0090.1) | AACCTTCCTCTG | 2212 | - | 7.94  | 0.000575 | 2.87  |
| TEAD1(MA0090.1) | CAAATTCCAGCC | 2239 | + | 7.69  | 0.000675 | 3.4   |
| TEAD1(MA0090.1) | CCCATTCCACCT | 2811 | + | 6.95  | 0.000975 | 4.9   |

1

2 **Supplemental Table 3 (Correlated to Figure 7c).** Clinical information for donors of the human  
3 heart failure tissues, listed in the order of the loading on the immunoblot.

| Donor ID | Age | Gender | Diabetes | HTN | BMI kg/m <sup>2</sup> | Diagnosis                                                              |
|----------|-----|--------|----------|-----|-----------------------|------------------------------------------------------------------------|
| HR0110   | 44  | F      | No       | Yes | 53.1                  | DCM, not restrictive or hypertrophic CM                                |
| HR0117   | 44  | M      | Yes      | Yes | 39.4                  | DCM, not restrictive or hypertrophic CM                                |
| HR0120   | 40  | M      | No       | Yes | 33.3                  | Post VAD sample, originally dx DCM, not restrictive or hypertrophic CM |
| HR0082   | 60  | F      | Yes      | Yes | 26.9                  | DCM, not restrictive or hypertrophic CM                                |

4

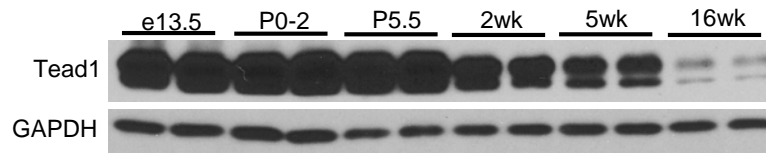

**Supplemental Figure 1. Tead1 expression levels during development in mouse hearts.**

Western blot showing the expression of Tead1 during mouse heart development at embryonic day 13.5, postnatal day 0-2, day 5.5, 2-week-old, 5-week-old and 16-week-old. GAPDH served as loading control.



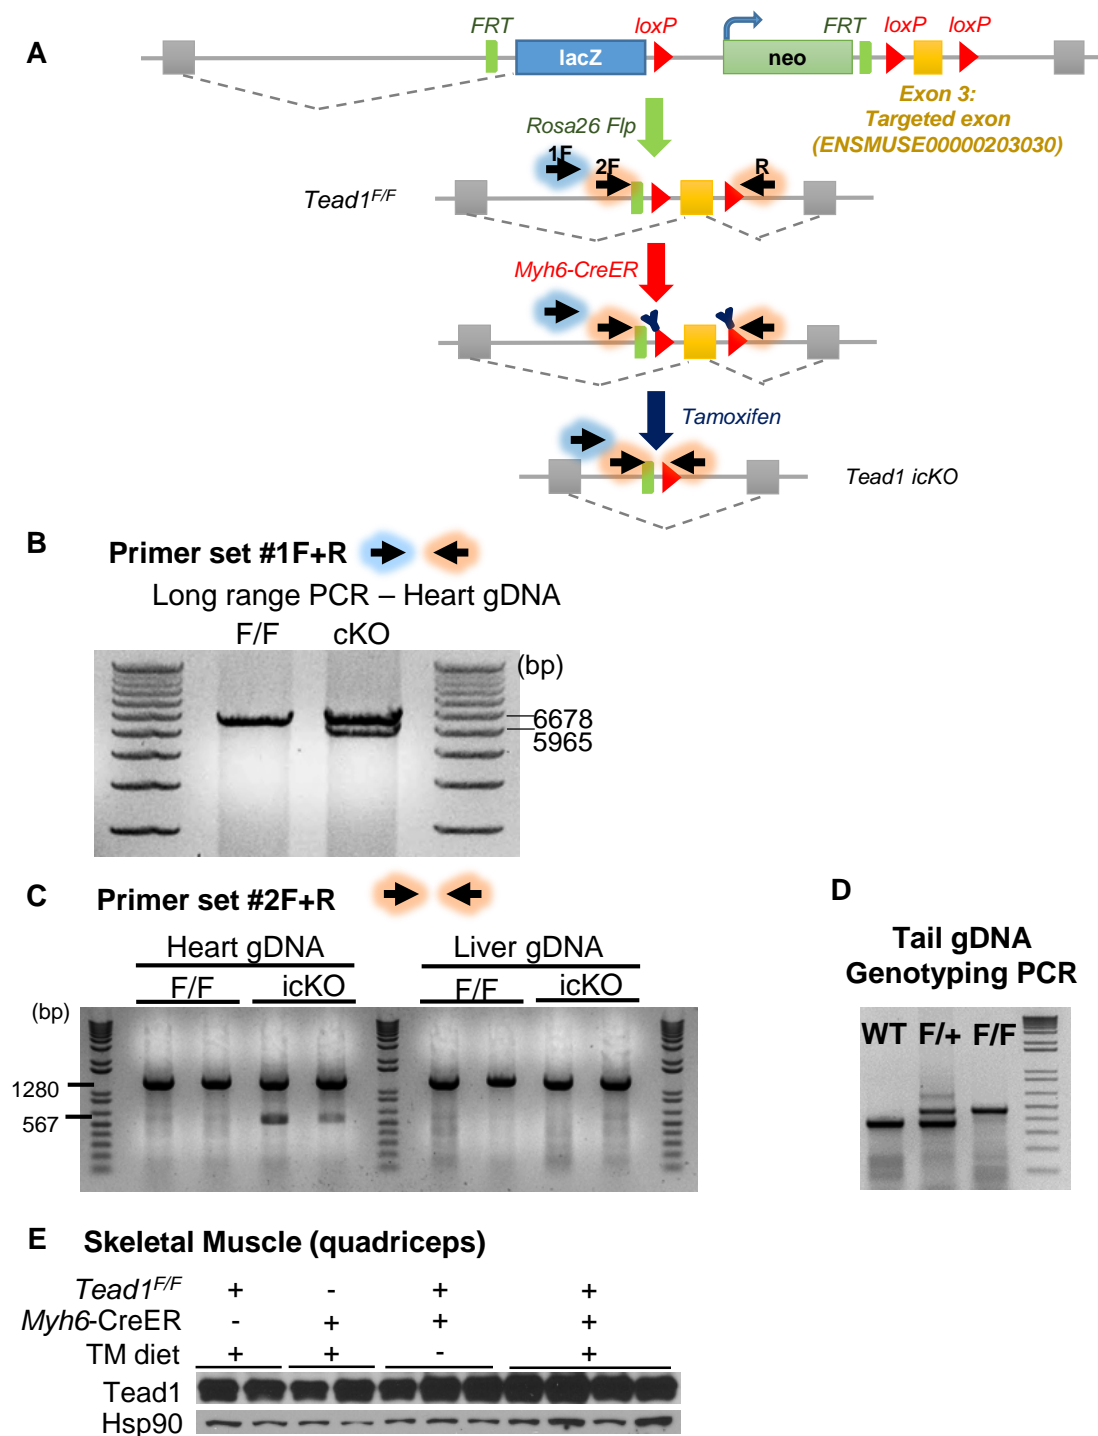

**Supplemental Figure 2. Generation of *Tead1* flox mice and cardiomyocyte-specific *Tead1* knockout mice.** (A) Generation of *Tead1* conditional knockout allele, and tamoxifen-induced cardiomyocyte specific knockout mice models (icKO) using knockout-first strategy: promoter-driven selection cassette. (B) *Tead1* flox allele verified by long-range PCR in cKO hearts. (C) PCR showing the recombined fragment of the *Tead1* allele in hearts from male icKO. (D) PCR confirmation of WT, *Tead1*<sup>F/+</sup> and *Tead1*<sup>F/F</sup> mice genotyping. (E) *Tead1* expression in skeletal muscle, by Western blotting, is not altered in *Tead1*-icKO mice.

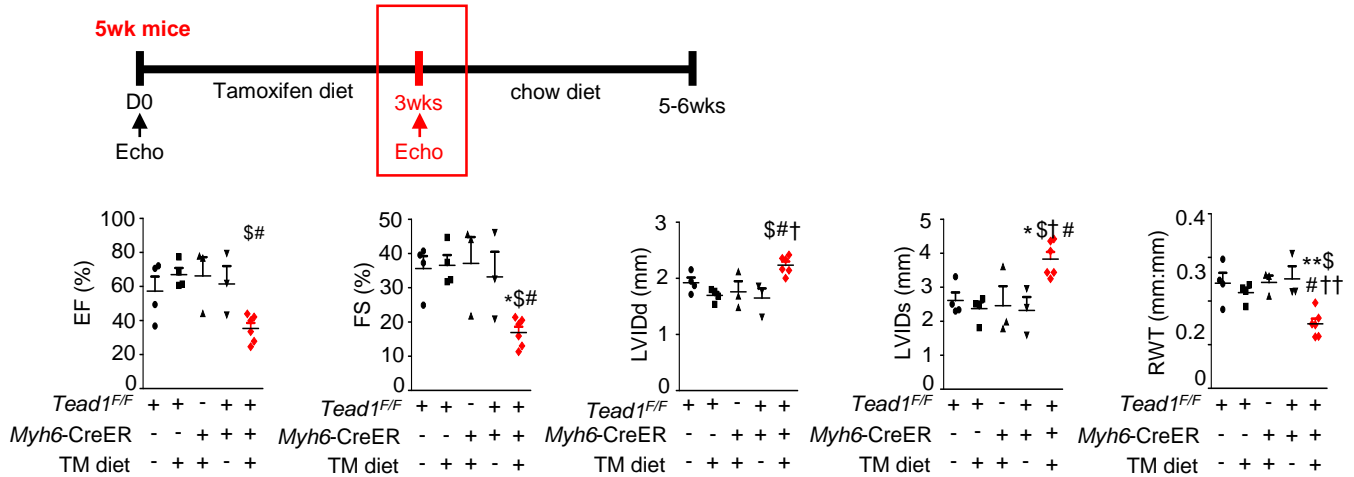

**Supplemental Figure 3. Echocardiographic assessment at 3 weeks of TM-diet protocol.** EF, ejection fraction; FS, fractional shortening; LVIDd, left ventricular internal diameter at end diastole; LVIDs, left ventricular internal diameter at end systole; RWT, relative wall thickness. \*\*\* $P < 0.001$ , \*\* $P < 0.01$ , \* $P < 0.05$ ; data were analyzed by one-way ANOVA with Tukey's *post hoc* test. Comparisons between  $Tead1$  icKO mice ( $n=6$ ) and  $Tead1^{F/F}$  chow diet mice ( $n=4$ ),  $Tead1^{F/F}$  TM diet mice ( $n=4$ ),  $Myh6-CreER$  TM diet mice ( $n=3$ ) or  $Tead1^{F/F};Myh6-CreER$  chow diet mice ( $n=3$ ) are indicated as \*, \$, # and † respectively. No significance was present among the four control groups.

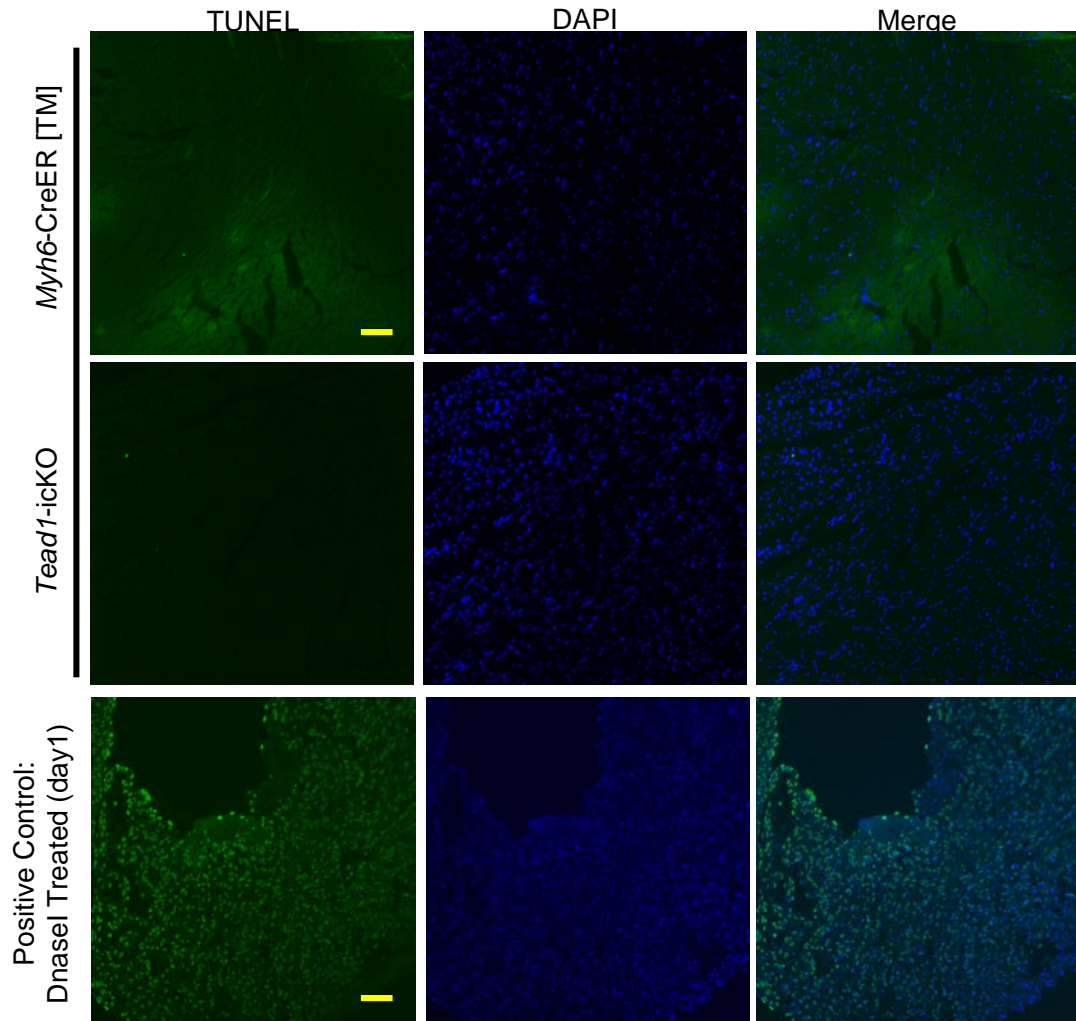

**Supplemental Figure 4. *Tead1* deletion did not increase apoptosis in the myocardium.** Representative figures of the TUNEL staining in control and *Tead1-icKO* heart sections. Scale bars, 100 $\mu$ m.

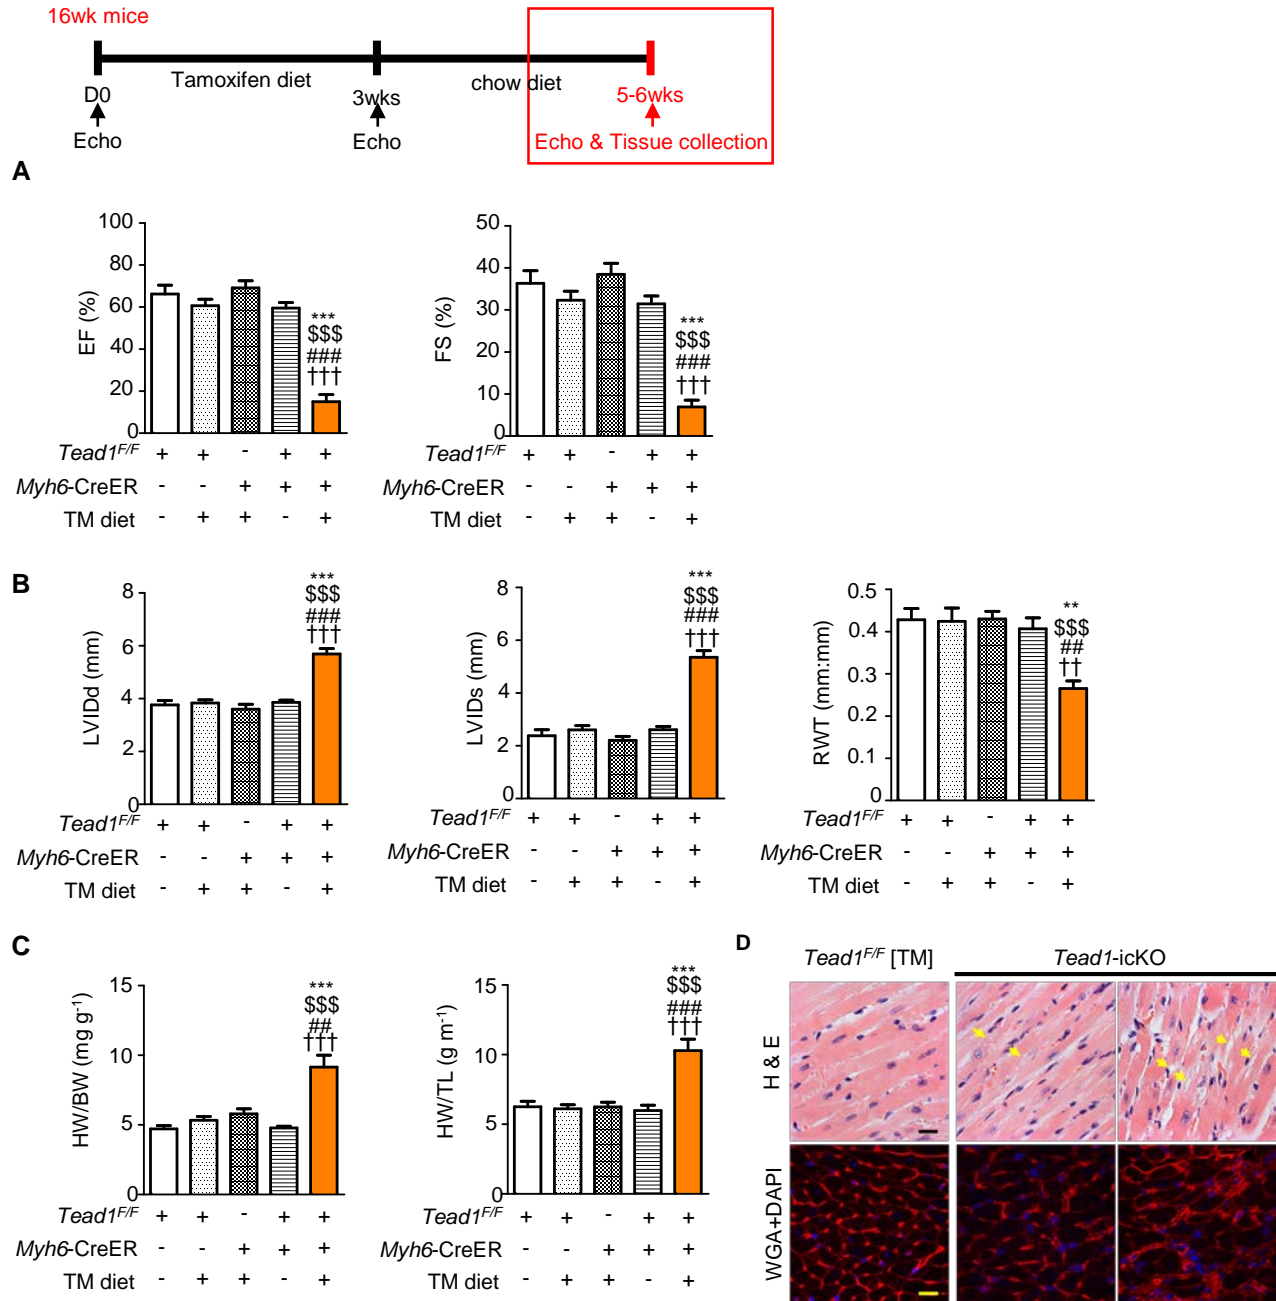

**Supplemental Figure 5. *Tead1* deletion in older (21-22 wk) mice (*Tead1 icKO*) also led to severe dilated cardiomyopathy. (A-B)** Echocardiographic assessment after six weeks of TM diet protocol. **(C)** Heart weight measurement normalized by body weight or tibial length. Values are shown as mean  $\pm$  S.E.M. \*\*\* $P < 0.001$ , \*\* $P < 0.01$ ; data were analyzed by one-way ANOVA with Tukey's *post hoc* test. Comparisons between *Tead1 icKO* mice ( $n=7-8$ , 4 males and 4-5 females) and *Tead<sup>F/F</sup>* chow diet mice ( $n=5$ , 3 males and 2 females), *Tead<sup>F/F</sup>* TM diet mice ( $n=9$ , 4 males and 5 females), *Myh6-CreER* TM diet mice ( $n=4-5$ , 2 males and 2-3 females) or *Tead<sup>F/F</sup>;Myh6-CreER* chow diet mice ( $n=9$ , 3 males and 6 females) are indicated as \*, \$, # and † respectively. No significance was present among the four control groups. **(D)** H&E staining and WGA staining (red) showed disrupted cardiac muscle structures. Nuclei were stained with DAPI (blue). Yellow arrowheads indicating disrupted sarcomere structure and cellular vacuolation. Scale bar, 20 $\mu$ m.

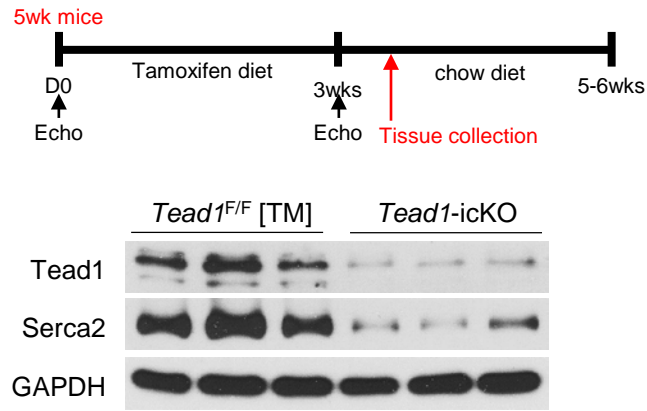

**Supplemental Figure 6. Tead1 is required for normal CM Serca2 expression.** Immunoblots from *Tead1-icKO* hearts after 3 weeks of TM-diet and 1 week chow.

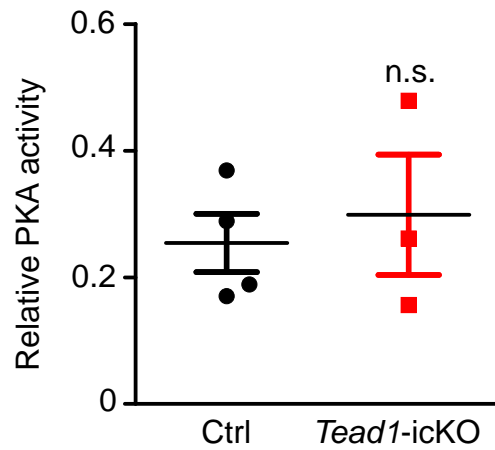

**Supplemental Figure 7. Protein Kinase A activity was unchanged in *Tead1-icKO* hearts.** PKA activity in *Tead1-icKO* hearts (n=3) and ctrl hearts (n=4, 2 *Tead1<sup>F/F</sup>* TM diet and 2 *Myh6-CreER* TM diet).

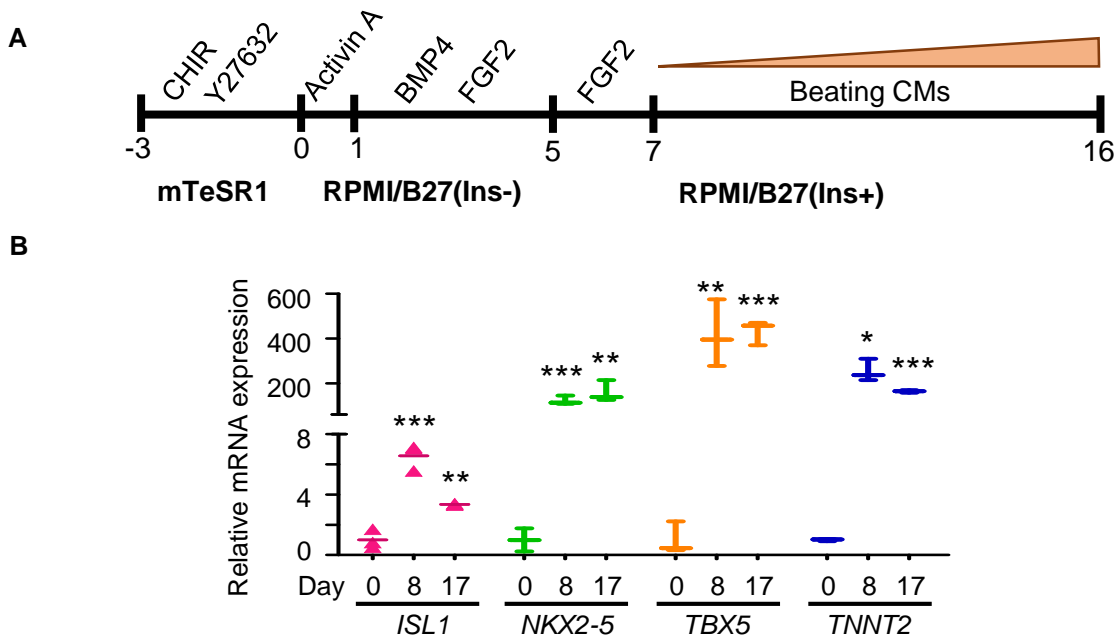

**Supplemental Figure 8. Differentiation of human induced pluripotent stem cells (hiPS) to cardiomyocytes. (A)** Cardiomyocyte differentiation protocol. **(B)** mRNA expression levels of the cardiac maturation markers during the differentiation. See also synchronized contractions in these cells after differentiation in **Supplemental Movie 3**.
